# Supplementary material
Source: PubMed Central journal article supplement (PMC2947932)
Supplement: Supp_Data.pdf [file Supp_Data.pdf]

# SUPPLEMENTAL MATERIAL

## Analytical Considerations of Local and Global Gradients in $c_{O_2}$

To justify the continuum treatment of the concentration distribution within our scaffolds, we must show that the typical gradient associated with a single cell is small compared to that of the full distribution of cells in the geometries considered. We estimate the average global gradients in  $c_{O_2}$  as

$$\nabla c_{\text{global}} \sim c_0 / \lambda_k \sim \sqrt{\frac{c_0 \rho_{\text{cell}} R_{O_2, \text{cell}}}{D}},$$

where  $\lambda_k \sim \sqrt{D c_0 / \rho_{\text{cell}} R_{O_2, \text{cell}}}$  is the Krogh length scale for global changes in  $c_{O_2}$  in a zeroth order model, and typical local gradients in  $c_{O_2}$  around a single cell as

$$\nabla c_{\text{local}} \sim \frac{c_{\text{local}}(r = 0.5 \rho_{\text{cell}}^{-1/3}) - c_{\text{local}}(r = r_{\text{cell}})}{0.5 \rho_{\text{cell}}^{-1/3}},$$

where we have taken the average intercellular spacing as the length scale that defines the cell's local environment. The local concentration profile in the vicinity of a single cell can be found by solving:

$$D \nabla^2 c = \rho_{\text{cell}} R_{O_2, \text{cell}}, \text{ assuming } c(r \rightarrow \infty) = c_{\infty}.$$

We therefore find, for a cellular point sink assumption, that

$$\nabla c_{\text{local}} \sim \frac{(R_{O_2, \text{cell}} / 4\pi D r_{\text{cell}})}{0.5 \rho_{\text{cell}}^{-1/3}}$$

and for  $r_{\text{cell}} \sim 8 \mu\text{m}$ , and  $\rho_{\text{cell}} \sim 60 \times 10^6 \text{ cell/mL}$ , we find

$$\frac{\nabla c_{\text{local}}}{\nabla c_{\text{global}}} \sim 0.03.$$

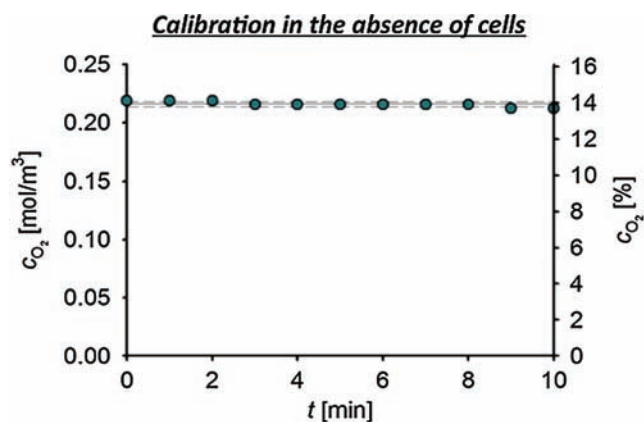

**SUPPLEMENTAL FIG. S1.** Control O<sub>2</sub> consumption measurement. O<sub>2</sub> concentration was measured in a sealed, magnetically stirred vial containing 2 mL Dulbecco's modified Eagle's medium, identical to the system used for cellular O<sub>2</sub> consumption measurements, with negligible change in concentration observed over 10 min. Data points represent individual measurements; the solid and dotted lines represent the mean and standard deviation of all measurements taken over the 10-min interval presented.

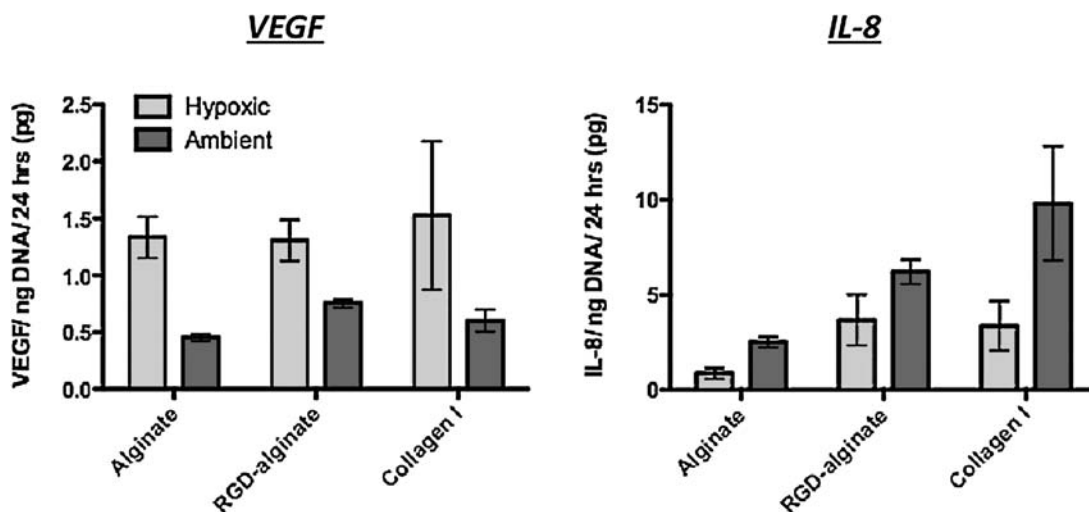

**SUPPLEMENTAL FIG. S2.** Summary of oral squamous cell carcinoma secretion data. Summary of oxygen partial pressure (pO<sub>2</sub>) and extracellular-matrix-dependent vascular endothelial growth factor (VEGF) and interleukin-8 (IL-8) secretions for three-dimensional cultured oral squamous cell carcinoma, cultured at hypoxia (1%) and ambient (18 ± 1%) O<sub>2</sub>, and in three different scaffold systems: nonmodified alginate, RGD-modified alginate, and type I collagen. Alginate cultures were in free-floating 200- $\mu$ m-thick disks, whereas the collagen culture was in <100  $\mu$ m of scaffold material, in a poly (dimethylsiloxane)-supported microwell format. Alginate data represent 24-h secretion periods, at a day-3 timepoint. Collagen data represent 24-h secretion periods, at a day-2 timepoint.
